# Supplementary material for: Algorithms for Difference-of-Convex Programs Based on Difference-of-Moreau-Envelopes Smoothing
Source: Atypon-hosted journal article supplement (doi:10.1287/ijoo.2022.0087), 2022-12-21
Supplement: ijoo.2022.0087.sm1.pdf [file ijoo.2022.0087.sm1.pdf]

## Electronic Companion

### EC.1. Preliminaries of Difference-of-Moreau-Envelopes Smoothing

#### EC.1.1. Moreau Envelope

We summarize some known properties of Moreau envelope in the next proposition.

PROPOSITION EC.1. *Suppose Assumption [1](#) holds and  $0 < \mu < 1/m_\phi$  in [\(10\)](#). Then the following claims hold.*

1.  $x_{\mu\phi}$  is Lipschitz continuous with modulus  $\frac{1}{1-\mu m_\phi}$ .
2.  $M_{\mu\phi}$  is differentiable with gradient  $\nabla M_{\mu\phi}(z) = \mu^{-1}(z - x_{\mu\phi}(z))$ .
3.  $\nabla M_{\mu\phi}$  is Lipschitz continuous with modulus  $\frac{2-\mu m_\phi}{\mu-\mu^2 m_\phi}$ .

*Proof.* The first two claims are well-known, see, e.g., ([Zhang and Luo 2020b](#), Lemma 3.5) and ([Rockafellar and Wets 2009](#), Proposition 13.37), combining which proves the last one.  $\square$

Proposition [EC.1](#) suggests that  $M_{\mu\phi}$  forms a smooth approximation of the possibly nonconvex nonsmooth function  $\phi$ . Similarly, the Moreau envelope and proximal mapping of  $g$  are given by  $M_{\mu g}$  and  $x_{\mu g}$ , respectively. Since  $g$  is convex, it is known that  $x_{\mu g}$  is 1-Lipschitz and  $M_{\mu g}$  is differentiable, whose gradient  $\nabla M_{\mu g}(z) = (z - x_{\mu g}(z))/\mu$  is  $1/\mu$ -Lipschitz ([Beck 2017](#), Theorem 6.60).

#### EC.1.2. Lipschitz Differentiability of $F_\mu$

PROPOSITION EC.2. *Suppose Assumption [1](#) holds and  $0 < \mu < 1/m_\phi$  in [\(10\)](#).  $F_\mu$  is differentiable, and  $\nabla F_\mu(z) = \mu^{-1}(x_{\mu g}(z) - x_{\mu\phi}(z))$  is Lipschitz continuous with modulus  $L_{F_\mu} = \frac{2-\mu m_\phi}{\mu-\mu^2 m_\phi}$ .*

*Proof.* By the Lipschitz differentiability of the Moreau envelope shown in Proposition [EC.1](#) and the definition of  $F_\mu$ , we know that  $F_\mu$  is differentiable, and  $\nabla F_\mu(z) = \nabla M_{\mu\phi}(z) - \nabla M_{\mu g}(z) = \mu^{-1}(x_{\mu g}(z) - x_{\mu\phi}(z))$ . Since  $x_{\mu g}$  and  $x_{\mu\phi}$  are Lipschitz with modulus 1 and  $\frac{1}{1-\mu m_\phi}$ , respectively, we obtain the claimed  $L_{F_\mu} = \frac{1}{\mu}(1 + \frac{1}{1-\mu m_\phi})$ .  $\square$

If  $\phi$  is convex, then the Lipschitz constant of  $\nabla F_\mu$  can be improved to  $2/\mu$  ([Hiriart-Urruty 1991](#)).

#### EC.1.3. Correspondence of Stationary Points and Global Minima of $F$ and $F_\mu$

In addition to being smooth, the approximation  $F_\mu$  captures both the local and global structure of the original function  $F$ . In particular, some properties of  $F_\mu$  established in [Hiriart-Urruty \(1991\)](#) are summarized in the next proposition.

PROPOSITION EC.3 ([Hiriart-Urruty \(1991\)](#)). *Suppose Assumptions [1](#) and [2](#) hold and  $0 < \mu < 1/m_\phi$  in [\(10\)](#). Then the following claims hold.*

1. The set of global minimizers of  $F_\mu$ ,  $\arg \min F_\mu$ , is nonempty, and  $F^* = \min_{z \in \mathbb{R}^n} F_\mu(z)$ .

2. (Correspondence of Stationary Point) If  $z$  is a stationary point of  $F_\mu$ , i.e.,  $\nabla F_\mu(z) = 0$ , then  $x_{\mu\phi}(z) = x_{\mu g}(z)$ , and  $x_{\mu\phi}(z)$  is a stationary point of  $F$  in the sense of [\(8\)](#) with  $F(x_{\mu\phi}(z)) = F_\mu(z)$ ; conversely, if  $x \in \mathbb{R}^n$  is a stationary point of  $F$ , then there exists  $z \in \mathbb{R}^n$  such that  $\nabla F_\mu(z) = 0$ ,  $z = x_\phi(x) = x_g(x)$ , and  $F_\mu(z) = F(x)$ .

3. (Correspondence of Global Minima) If  $z \in \arg \min F_\mu$ , then  $x_{\mu\phi}(z) \in \arg \min F$ ; conversely, if  $x \in \arg \min F$ , then there exists  $z \in \arg \min F_\mu$  such that  $x = x_{\mu\phi}(z) = x_{\mu g}(z)$ .

## EC.2. Proofs in Section [3](#)

### EC.2.1. Proof of Proposition [1](#)

*Proof.* By Proposition [EC.3](#) and Lemma [1](#), we know  $x_{\mu\phi}(\bar{z}) = x_{\mu g}(\bar{z})$ , and for all  $z$  such that  $\|z - \bar{z}\| \leq r$ , we have  $F(x_{\mu g}(\bar{z})) = F(x_{\mu\phi}(\bar{z})) = F_\mu(\bar{z}) \leq F_\mu(z) \leq F(x_{\mu g}(z))$ . It suffices to show that, for all  $x$  sufficiently close to  $x_{\mu g}(\bar{z})$ , there exists some  $z \in \mathbb{R}^n$  such that  $\|z - \bar{z}\| \leq r$  and  $x = x_{\mu g}(z)$ . In particular, take  $\tilde{\nabla}g(x) \in \partial g(x)$  and let  $z = x + \mu\tilde{\nabla}g(x)$ . By construction, we have  $0 = \tilde{\nabla}g(x) + \mu^{-1}(x - z) \in \partial g(x) + \mu^{-1}(x - z)$ , and therefore  $x = x_{\mu g}(z)$ . It follows that

$$\begin{aligned} \|z - \bar{z}\| &= \|x + \mu\tilde{\nabla}g(x) - x_{\mu g}(\bar{z}) - \mu\tilde{\nabla}g(x_{\mu g}(\bar{z}))\| \\ &\leq \|x - x_{\mu g}(\bar{z})\| + \mu\|\tilde{\nabla}g(x) - \tilde{\nabla}g(x_{\mu g}(\bar{z}))\| \leq \begin{cases} (1 + \mu L_g)\|x - x_{\mu g}(\bar{z})\| \leq r \\ r - 2\mu M_{\partial g} + 2\mu M_{\partial g} = r, \end{cases} \end{aligned}$$

where the two cases above correspond to the two claims respectively.  $\square$

### EC.2.2. Proof of Proposition [2](#)

*Proof.* 1. We prove that  $\text{lev}_\alpha F_\mu$  is bounded. Without loss of generality, we consider  $\alpha \geq F^*$ , otherwise  $\text{lev}_\alpha F_\mu = \emptyset$  by Proposition [EC.3](#). Firstly notice that

$$\text{lev}_\alpha F_\mu \subseteq \{z : M_{\mu\phi}(z) - g(z) \leq \alpha\} \subseteq \left\{z : \exists x \text{ s.t. } F(x) + \frac{1}{2\mu}\|x - z\|^2 - L\|x - z\| \leq \alpha + M\right\}, \quad (\text{EC.1})$$

where the first inclusion is due to  $M_{\mu g} \leq g$ , and the second inclusion is due to our assumption on  $g$ . Using the fact that  $L\|x - z\| \leq \frac{tL^2}{2} + \frac{\|x - z\|^2}{2t}$  for any  $t > 0$  and taking  $t = 2\mu$ , we have

$$F(x) + \frac{1}{2\mu}\|x - z\|^2 - L\|x - z\| \geq F(x) + \frac{1}{4\mu}\|x - z\|^2 - \mu L^2. \quad (\text{EC.2})$$

Now [\(EC.1\)](#), [\(EC.2\)](#), and the fact that  $F(x) + \frac{1}{4\mu}\|x - z\|^2 \geq \max\{F(x), F^* + \frac{1}{4\mu}\|x - z\|^2\}$  imply that

$$\text{lev}_\alpha F_\mu \subseteq \left\{z : \|z\| \leq \sqrt{(4\mu)(\alpha + M + \mu L^2 - F^*)} + \max_{x:F(x) \leq \alpha + M + \mu L^2} \|x\|\right\}. \quad (\text{EC.3})$$

Since  $\text{lev}_{\alpha + M + \mu L^2} F$  is compact,  $\max_{x:F(x) \leq \alpha + M + \mu L^2} \|x\|$  is finite, and hence  $\text{lev}_\alpha F_\mu$  is bounded.

2. Suppose  $F = \phi - g \geq \alpha \|\cdot\| + r$  for some  $a \in (0, +\infty)$  and  $r \in \mathbb{R}$ . For a convex function  $f$ , we use  $f^*$  to denote its convex conjugate, i.e.,  $f^*(z) = \sup_x \langle z, x \rangle - f(x)$ . By definition, we have

$$\begin{aligned} \mu F_\mu &= \mu(M_{\mu\phi} - M_{\mu g}) = \left( \mu g + \frac{1}{2} \|\cdot\|^2 \right)^* - \left( \mu\phi + \frac{1}{2} \|\cdot\|^2 \right)^* \\ &\geq \left( \mu g + \frac{1}{2} \|\cdot\|^2 \right)^* - \left( \mu g + \mu\alpha \|\cdot\| + \mu r + \frac{1}{2} \|\cdot\|^2 \right)^*, \end{aligned} \quad (\text{EC.4})$$

where the inequality uses the fact that  $f_1 \geq f_2$  implies  $f_1^* \leq f_2^*$  for any functions  $f_1$  and  $f_2$ .

We first consider some properties of the first term in [\(EC.4\)](#). For simplicity, denote  $p = (\mu g + \frac{1}{2} \|\cdot\|^2)^*$ . Since  $\mu g + \frac{1}{2} \|\cdot\|^2$  is strongly convex with modulus 1, its conjugate  $p$  is convex and has Lipschitz gradient with modulus 1 ([Beck 2017](#), Theorem 5.26). Moreover, we claim that  $p$  is coercive: notice that for any  $\bar{\alpha} \in (0, +\infty)$ , we have

$$p(z) = \max_x \left\{ \langle z, x \rangle - \mu g(x) - \frac{1}{2} \|x\|^2 \right\} \geq \max_{x: \|x\| \leq \bar{\alpha}} \langle z, x \rangle - \max_{x: \|x\| \leq \bar{\alpha}} \left\{ \mu g(x) + \frac{1}{2} \|x\|^2 \right\} = \bar{\alpha} \|z\| + \bar{r},$$

where  $\bar{r} = -\max_{x: \|x\| \leq \bar{\alpha}} \left\{ \mu g(x) + \frac{1}{2} \|x\|^2 \right\}$  is finite, since  $\mu g + \frac{1}{2} \|\cdot\|^2$  achieves a finite maximum over the compact set  $\{x: \|x\| \leq \bar{\alpha}\}$ .

Next we rewrite the second term in [\(EC.4\)](#): for any  $z \in \mathbb{R}^n$ ,

$$\begin{aligned} \left( \mu g + \mu\alpha \|\cdot\| + \mu r + \frac{1}{2} \|\cdot\|^2 \right)^*(z) &= \min_x \left\{ p(x) + (\alpha\mu \|\cdot\| + \mu r)^*(z - x) \right\} \\ &= \min_{w: \|w\| \leq \alpha\mu} p(z - w) - \mu r, \end{aligned} \quad (\text{EC.5})$$

where the first equality is due to ([Beck 2017](#), Theorem 4.17), and the second equality uses the following facts:  $\|\cdot\|^* = \delta_{\{x: \|x\| \leq 1\}}$  ([Beck 2017](#), Section 4.4.2), and  $(\alpha\mu \|\cdot\| + \mu r)^*(w) = (\alpha\mu) \|\cdot\|^* \left( \frac{w}{\alpha\mu} \right) - \mu r$  ([Beck 2017](#), Theorem 4.13, 4.14). Combining [\(EC.4\)](#) and [\(EC.5\)](#), we have

$$\begin{aligned} \mu F_\mu(z) &\geq p(z) - \min_{w: \|w\| \leq \alpha\mu} p(z - w) + \mu r = \max_{w: \|w\| \leq \alpha\mu} p(z) - p(z - w) + \mu r \\ &\geq \max_{w: \|w\| \leq \alpha\mu} \langle \nabla p(z), w \rangle - \frac{1}{2} \|w\|^2 + \mu r \geq \alpha\mu \|\nabla p(z)\| - \frac{1}{2} \alpha^2 \mu^2 + \mu r, \end{aligned} \quad (\text{EC.6})$$

where the second inequality is due to the Lipschitz differentiability of  $p$ , and the last inequality holds with  $w = \alpha\mu \frac{\nabla p(z)}{\|\nabla p(z)\|}$  when  $\|\nabla p(z)\| > 0$ , or any  $w$  with  $\|w\| = \alpha\mu$  when  $\|\nabla p(z)\| = 0$ . Notice that [\(EC.6\)](#) further suggests that

$$\liminf_{\|z\| \rightarrow \infty} \mu F_\mu(z) \geq \liminf_{\|z\| \rightarrow \infty} \alpha \|\nabla p(z)\| - \frac{1}{2} \alpha^2 \mu + r \geq \alpha \liminf_{\|z\| \rightarrow \infty} \frac{p(z) - p(0)}{\|z\|} - \frac{1}{2} \alpha^2 \mu + r = +\infty, \quad (\text{EC.7})$$

where the second inequality is due to the convexity of  $p$ :  $\|\nabla p(z)\| \|z\| \geq \nabla p(z)^\top z \geq p(z) - p(0)$ , and the last equality is due to  $p$  being coercive (see an equivalent characterization in ([Rockafellar and Wets 2009](#), Definition 3.25)). Therefore, [\(EC.7\)](#) implies that  $F_\mu$  is level-bounded.

3. Since  $\text{dom } \phi$  is compact, there exists  $R > 0$  such that  $\text{dom } \phi \subseteq \{x : \|x\| \leq R\}$ . Notice that

$$\begin{aligned} F_\mu(z) &\geq \min_{x: \|x\| \leq R} \left\{ \phi(x) + \frac{1}{2\mu} \|x\|^2 - \frac{1}{\mu} \langle x, z \rangle \right\} + \max_x \left\{ \frac{1}{\mu} \langle x, z \rangle - g(x) - \frac{1}{2\mu} \|x\|^2 \right\} \\ &\geq \hat{\phi}^* - \frac{R}{\mu} \|z\| + \max_x \left\{ \frac{1}{\mu} \langle x, z \rangle - g(x) - \frac{1}{2\mu} \|x\|^2 \right\}, \end{aligned}$$

where in the last inequality,  $\hat{\phi}^* = \min_x \{\phi(x) + \frac{1}{2\mu} \|x\|^2\}$  is well-defined by the strong convexity of  $\phi + \frac{1}{2\mu} \|\cdot\|^2$ . Pick any  $\alpha \in (0, +\infty)$ . By a similar argument used in the previous part, we have

$$\max_x \left\{ \frac{1}{\mu} \langle x, z \rangle - g(x) - \frac{1}{2\mu} \|x\|^2 \right\} \geq \left( \frac{R}{\mu} + \alpha \right) \|z\| - \max_{x: \|x\| \leq R + \mu\alpha} \left\{ g(x) + \frac{1}{2\mu} \|x\|^2 \right\}.$$

Combining the above two inequalities, we have  $F_\mu(z) \geq \alpha \|z\| + r$ , where  $r = \hat{\phi}^* - \max_{x: \|x\| \leq R + \mu\alpha} \left\{ g(x) + \frac{1}{2\mu} \|x\|^2 \right\}$  is finite. Therefore, we conclude that  $F_\mu$  is coercive, and hence also level-bounded.

4. We show that  $\text{lev}_\alpha F_\mu$  is bounded. Let  $z \in \text{lev}_\alpha F_\mu$ . By Lemma [1](#) and the assumption that  $F$  is level-bounded, we know that  $x_{\mu\phi}(z) \in \text{lev}_\alpha F$  and hence is bounded. The definition of  $x_{\mu\phi}$  gives  $z \in \partial(\mu\phi + \frac{1}{2}\|\cdot\|^2)(x_{\mu\phi}(z))$ . Since  $x_{\mu\phi}(z)$  is bounded, and  $\mu\phi + \frac{1}{2}\|\cdot\|^2$  is a (strongly) convex function whose domain is  $\mathbb{R}^n$ , we conclude that  $z$  is bounded ([Rockafellar 1970](#), Theorem 24.7).  $\square$

### EC.3. Proofs in Section [4](#)

#### EC.3.1. Proof of Theorem [1](#)

*Proof.* Notice that since  $\nabla F_\mu$  is  $L_{F_\mu}$ -Lipschitz and  $\alpha \leq 1/L_{F_\mu}$ , we have

$$F_\mu(z^k) - F_\mu(z^{k+1}) \geq \left( \frac{1}{\alpha} - \frac{L_{F_\mu}}{2} \right) \|z^{k+1} - z^k\|^2 \geq \frac{1}{2\alpha} \|z^{k+1} - z^k\|^2 = \frac{\alpha}{2\mu^2} \|x_{\mu g}(z^k) - x_{\mu\phi}(z^k)\|^2.$$

Summing the above inequality over  $k = 0, \dots, K-1$  for some positive integer  $K-1$ , we have

$$\sum_{k=0}^{K-1} \|x_{\mu g}(z^k) - x_{\mu\phi}(z^k)\|^2 \leq \frac{2\mu^2}{\alpha} (F_\mu(z^0) - F_\mu(z^K)) \leq \frac{2\mu^2}{\alpha} (F_\mu(z^0) - F^*). \quad (\text{EC.8})$$

Let  $\bar{k} = \arg \min_{k=0, \dots, K-1} \|x_{\mu g}(z^k) - x_{\mu\phi}(z^k)\|^2$ , then from [\(EC.8\)](#) it holds

$$\|x_{\mu g}(z^{\bar{k}}) - x_{\mu\phi}(z^{\bar{k}})\| \leq \left( \frac{2\mu^2 (F_\mu(z^0) - F^*)}{\alpha K} \right)^{1/2}. \quad (\text{EC.9})$$

For any  $k \in \mathbb{Z}_+$ , due to the optimality of the proximal mapping  $x_{\mu\phi}(z^k)$  and  $x_{\mu g}(z^k)$ , we have

$$\xi^k = \mu^{-1}(z^k - x_{\mu\phi}(z^k)) - \mu^{-1}(z^k - x_{\mu g}(z^k)) \in \partial\phi(x_{\mu\phi}(z^k)) - \partial g(x_{\mu g}(z^k)). \quad (\text{EC.10})$$

In view of [\(EC.9\)](#), we have [\(12\)](#) proved due to the claimed upper bound  $K$  in [\(13\)](#). Since  $F_\mu$  is level-bounded and  $\{F_\mu(z^k)\}_{k \in \mathbb{N}}$  is monotonically non-increasing, we know the sequence  $\{z^k\}_{k \in \mathbb{N}}$  is bounded and therefore has at least one limit point  $z^*$ . Let  $\{z^{k_j}\}_{j \in \mathbb{N}}$  denote the subsequence

convergent to  $z^*$ . Since  $x_{\mu\phi}$  and  $x_{\mu g}$  are continuous, (EC.8) implies  $x_{\mu\phi}(z^*) = x_{\mu g}(z^*)$ . Since  $g$  is continuous, we have  $\lim_{j \rightarrow \infty} g(x_{\mu g}(z^{k_j})) = g(x_{\mu g}(z^*))$ ; in addition,

$$\begin{aligned} \phi(x_{\mu\phi}(z^*)) &\leq \liminf_{j \rightarrow \infty} \phi(x_{\mu\phi}(z^{k_j})) \leq \limsup_{j \rightarrow \infty} \phi(x_{\mu\phi}(z^{k_j})) \\ &\leq \lim_{j \rightarrow \infty} \left[ \phi(x_{\mu\phi}(z^*)) + \frac{1}{2\mu} \|x_{\mu\phi}(z^*) - z^{k_j}\|^2 - \frac{1}{2\mu} \|x_{\mu\phi}(z^{k_j}) - z^{k_j}\|^2 \right] = \phi(x_{\mu\phi}(z^*)), \end{aligned}$$

where the first inequality is due to the lower-semicontinuity of  $\phi$  and the last inequality is due to the optimality of  $x_{\mu\phi}(z^{k_j})$  in each Moreau envelope evaluation, and therefore we also have  $\lim_{j \rightarrow \infty} \phi(x_{\mu\phi}(z^{k_j})) = \phi(x_{\mu\phi}(z^*))$ . Taking limit on (EC.10) along the subsequence gives (8).  $\square$

### EC.3.2. Proof of Lemma 2

*Proof* We first show that the sequence is bounded from below:

$$\mathcal{F}(x^k, z^k) \geq \min_x f(x) + h(x) + \frac{1}{2\mu} \|x - z^k\|^2 - M_{\mu g}(z^k) = F_{\mu}(z^k) \geq F^*,$$

where the last inequality is due to Proposition EC.2. Next we show the descent in  $x$ :

$$\begin{aligned} \mathcal{F}(x^{k+1}, z^k) &\leq f(x^k) + \langle \nabla f(x^k), x^{k+1} - x^k \rangle + \frac{L_f}{2} \|x^{k+1} - x^k\|^2 + h(x^{k+1}) + \frac{1}{2\mu} \|x^{k+1} - z^k\|^2 - M_{\mu g}(z^k) \\ &\leq f(x^k) + h(x^k) + \frac{1}{2\mu} \|x^k - z^k\|^2 - M_{\mu g}(z^k) + \left( \frac{L_f}{2} - \frac{1}{2\mu} \right) \|x^{k+1} - x^k\|^2 \\ &= \mathcal{F}(x^k, z^k) - \left( \frac{\mu^{-1} - L_f}{2} \right) \|x^{k+1} - x^k\|^2, \end{aligned} \tag{EC.11}$$

where the first inequality is due to the Lipschitz differentiability of  $f$  and the second inequality is due to  $x^{k+1}$  being the minimizer of some  $\mu^{-1}$ -strongly convex function. The descent with respect to  $z$  is given as:

$$\begin{aligned} &\mathcal{F}(x^{k+1}, z^k) - \mathcal{F}(x^{k+1}, z^{k+1}) \\ &= \frac{1}{\mu} \left( \frac{1}{\beta} - \frac{1}{2} \right) \|z^{k+1} - z^k\|^2 + M_{\mu g}(z^{k+1}) - M_{\mu g}(z^k) - \left\langle \frac{1}{\mu} (z^k - x_{\mu g}(z^k)), z^{k+1} - z^k \right\rangle \\ &\geq \frac{1}{\mu} \left( \frac{1}{\beta} - \frac{1}{2} \right) \|z^{k+1} - z^k\|^2, \end{aligned} \tag{EC.12}$$

where we replace  $x^{k+1}$  by  $x_{\mu g}(z^k) + \frac{1}{\beta}(z^{k+1} - z^k)$  to get the equality, and the inequality is due to  $M_{\mu g}$  being convex and  $\nabla M_{\mu g}(z^k) = \mu^{-1}(z^k - x_{\mu g}(z^k))$ . Combining (EC.11) and (EC.12) gives (15).  $\square$

### EC.3.3. Proof of Theorem 2

*Proof.* By Lemma 2, we have

$$\mathcal{F}(x^k, z^k) - \mathcal{F}(x^{k+1}, z^{k+1}) \geq \min\{c_1, c_2\} (\|x^{k+1} - x^k\|^2 + \|z^{k+1} - z^k\|^2),$$

summing which from  $k = 0$  to some positive integer  $K - 1$  gives

$$\sum_{k=0}^{K-1} (\|x^{k+1} - x^k\|^2 + \|z^{k+1} - z^k\|^2) \leq \frac{\mathcal{F}(x^0, z^0) - \mathcal{F}(x^K, z^K)}{\min\{c_1, c_2\}} \leq \frac{\mathcal{F}(x^0, z^0) - F^*}{\min\{c_1, c_2\}}. \quad (\text{EC.13})$$

Let  $\bar{k} = \arg \min_{k=0, \dots, K-1} \|x^{k+1} - x^k\|^2 + \|z^{k+1} - z^k\|^2$ , then [\(EC.13\)](#) implies

$$\max\{\|x^{\bar{k}+1} - x^{\bar{k}}\|, \|z^{\bar{k}+1} - z^{\bar{k}}\|\} \leq \left( \frac{\mathcal{F}(x^0, z^0) - F^*}{\min\{c_1, c_2\}K} \right)^{1/2}. \quad (\text{EC.14})$$

Due to the optimality condition of  $x^{k+1}$  and  $x_{\mu g}(z^k)$ , we have

$$\xi^{k+1} \in \nabla f(x^{k+1}) + \partial h(x^{k+1}) - \partial g(x_{\mu g}(z^k)) = \partial \phi(x^{k+1}) - \partial g(x_{\mu g}(z^k)),$$

which proves [\(17a\)](#). Now in view of [\(EC.14\)](#), we have

$$\max\{\|\xi^{\bar{k}+1}\|, \|x_{\mu g}(z^{\bar{k}}) - x^{\bar{k}+1}\|\} \leq \left( L_f + \frac{\mu^{-1} + 1}{\beta} \right) \left( \frac{\mathcal{F}(x^0, z^0) - F^*}{\min\{c_1, c_2\}K} \right)^{1/2},$$

which proves [\(17b\)](#) and [\(18\)](#).

Next we show that if  $F_\mu$  is level bounded, then  $\{(x^k, z^k)\}_{k \in \mathbb{N}}$  stays bounded. Since  $F_\mu$  is continuous and level-bounded, and  $\mathcal{F}(x^0, z^0) \geq \mathcal{F}(x^k, z^k) \geq F_\mu(z^k)$ , we know that  $z^k$  stays in some compact level set of  $F_\mu$ . Since the mapping  $x_{\mu g}$  is continuous,  $x_{\mu g}(z^k)$  is also bounded. Consequently,  $x^{k+1} = x_{\mu g}(z^k) + \frac{1}{\beta}(z^{k+1} - z^k)$  stays bounded for all  $k \in \mathbb{N}$ . Therefore, the sequence  $\{(x^k, z^k)\}_{k \in \mathbb{N}}$  has a limit point, denoted as  $(x^*, z^*)$ . Let  $\{(x^{k_j}, z^{k_j})\}_{j \in \mathbb{N}}$  be a subsequence converging to  $(x^*, z^*)$ . Since  $\|x^{k_j} - x^{k_j-1}\| \rightarrow 0$  and  $\|z^{k_j} - z^{k_j-1}\| \rightarrow 0$ , taking limit on  $x^{k+1} = x_{\mu g}(z^k) + \frac{1}{\beta}(z^{k+1} - z^k)$  along the subsequence gives  $x^* = x_{\mu g}(z^*)$ . Finally the asymptotical convergence follows a similar argument as in the proof of [Theorem 1](#).  $\square$

## EC.4. Proofs in [Section 5](#)

### EC.4.1. Proof of [Lemma 3](#)

*Proof.* We first verify condition [\(20\)](#) under the first two conditions. Since  $g$  is Lipschitz, we have  $-g(y) \geq -g(x) - L_g\|x - y\| \geq -g(x) - \frac{1}{2}\|x - y\|^2 - \frac{L_g^2}{2}$ . For  $0 < \mu \leq 1$ , it follows that

$$v(\mu, \rho) \geq \inf_{x \in \mathbb{R}^n} \left\{ f(x) - g(x) + \frac{\rho}{2}\|Ax - b\|^2 \right\} - \frac{L_g^2}{2}. \quad (\text{EC.15})$$

The first case implies that [\(EC.15\)](#) is finite for any  $\rho \geq 0$ . For the second case, notice that we can choose  $\rho > 0$  big enough so that  $\nabla^2 f + \rho A^\top A \succ 0$ . Since  $-g$  dominates an affine function, the objective in the right-hand side of [\(EC.15\)](#) is level-bounded, and hence  $v(\mu, \rho) > -\infty$ .

Next we verify condition [\(20\)](#) for the third case. Denote  $\nabla^2 f = F$  and  $\nabla^2 g = G$ . The Hessian of the

objective in  $(x, y)$  in the right-hand side of (20) is positive-definite if  $\mu < \lambda_{\max}(G)^{-1}$  and its Schur complement

$$\begin{aligned} S(\mu, \rho) &:= F + \rho A^\top A + \frac{1}{\mu} I_n - \left( -\frac{1}{\mu} I_n \right) \left( \frac{1}{\mu} I_n - G \right)^{-1} \left( -\frac{1}{\mu} I_n \right) \\ &= F + \rho A^\top A + \frac{1}{\mu} I_n - \frac{1}{\mu^2} [\mu I_n + \mu^2 G (I_n - \mu G)^{-1}] = F + \rho A^\top A - G (I_n - \mu G)^{-1} \end{aligned}$$

is positive-definite, where we use the Woodbury matrix identity in the second equality, and  $I_n \in \mathbb{R}^{n \times n}$  denotes the identity matrix. Since  $F \succ 0$  over the null space of  $A$  by assumption, we can choose  $\rho > 0$  large enough so that  $F + \rho A^\top A \succ 0$ . Since  $\lambda_{\max}(G(I - \mu G)^{-1}) \rightarrow \lambda_{\max}(G)$  as  $\mu \rightarrow 0$ , we know  $S(\mu, \rho) \succ 0$  if the smallest eigenvalue of  $F$  over the null space of  $A$  is strictly greater than  $\lambda_{\max}(G)$ . This completes the proof.  $\square$

#### EC.4.2. Proof of Lemma 4

*Proof.* Similar to the derivation in (EC.11)-(EC.12), the descent of  $\psi$  in  $x$  and  $z$  are given as

$$\begin{aligned} \psi(x^k, z^k, \lambda^k) - \psi(x^{k+1}, z^k, \lambda^k) &\geq \left( \frac{\mu^{-1} - L_f}{2} \right) \|x^{k+1} - x^k\|^2, \\ \psi(x^{k+1}, z^k, \lambda^k) - \psi(x^{k+1}, z^{k+1}, \lambda^k) &\geq \frac{1}{\mu} \left( \frac{1}{\beta} - \frac{1}{2} \right) \|z^{k+1} - z^k\|^2. \end{aligned}$$

In addition,

$$\psi(x^{k+1}, z^{k+1}, \lambda^k) - \psi(x^{k+1}, z^{k+1}, \lambda^{k+1}) = \langle \lambda^k - \lambda^{k+1}, Ax^{k+1} - b \rangle = -\frac{1}{\rho} \|\lambda^{k+1} - \lambda^k\|^2.$$

Adding the above three expressions completes the proof.  $\square$

#### EC.4.3. Proof of Lemma 5

*Proof.* For  $k \in \mathbb{N}$ , the update of  $x^{k+1}$  gives  $\nabla f(x^k) + A^\top \lambda^{k+1} + \mu^{-1}(x^{k+1} - z^k) = 0$ , which implies that for  $k \in \mathbb{N}$ ,  $A^\top(\lambda^{k+1} - \lambda^k) = \mu^{-1}(x^k - x^{k+1}) + (\nabla f(x^{k-1}) - \nabla f(x^k)) + \mu^{-1}(z^k - z^{k-1})$ . Since  $\lambda^{k+1} - \lambda^k = \rho(Ax^{k+1} - b)$  belongs to the column space of  $A$ , we have

$$\sigma_{\min}^+(A) \|\lambda^{k+1} - \lambda^k\| \leq \|A^\top(\lambda^{k+1} - \lambda^k)\| \leq \mu^{-1} \|x^{k+1} - x^k\| + L_f \|x^k - x^{k-1}\| + \mu^{-1} \|z^k - z^{k-1}\|,$$

where the first inequality is due to the min-max theorem of eigenvalues of a real symmetric matrix.

Dividing both sides by  $\sigma_{\min}^+(A)$  gives the desired inequality.  $\square$

#### EC.4.4. Proof of Lemma 6

*Proof.* 1. By Lemma 5, squaring both sides gives

$$\|\lambda^{k+1} - \lambda^k\|^2 \leq c_3 \|x^{k+1} - x^k\|^2 + c_4 \|x^k - x^{k-1}\|^2 + c_3 \|z^k - z^{k-1}\|^2.$$

Then (28) follows from Lemma 4 and constants defined in (27).

2. Recall that

$$\begin{aligned}\Psi_k &\geq \psi(x^k, z^k, \lambda^k) \geq f(x^k) - g(z^k) + \frac{\rho}{2} \|Ax^k - b\|^2 + \frac{1}{2\mu} \|x^k - z^k\|^2 + \frac{1}{\rho} \langle \lambda^k, \lambda^k - \lambda^{k-1} \rangle \\ &\geq v(\mu, \rho) + \frac{1}{2\rho} (\|\lambda^k\|^2 - \|\lambda^{k-1}\|^2),\end{aligned}$$

where the second inequality is due to  $M_{\mu g}(z) \leq g(z)$  and  $\lambda^k = \lambda^{k-1} + \rho(Ax^k - b)$ , and the third inequality is due to (20). This further implies that

$$\sum_{k=1}^K (\Psi_k - v(\mu, \rho)) \geq \frac{1}{2\rho} (\|\lambda^K\|^2 - \|\lambda^0\|^2) \geq -\frac{1}{2\rho} \|\lambda^0\|^2 > -\infty,$$

for all positive integer  $K$ . Since  $\Psi_k$  is non-increasing, we must have  $\Psi_k \geq v(\mu, \rho)$  for all  $k \in \mathbb{Z}_+$ ; otherwise, there exists some  $\delta > 0$  such that  $\Psi_k - v(\mu, \rho) < -\delta$  for all large enough  $k$ , then the above summation would converge to  $-\infty$  as  $K \rightarrow \infty$ .

3. For any positive integer  $K$ , summing (28) from 0 to  $K-1$  gives

$$\begin{aligned}&\kappa_{\min} K \min_{k=0, \dots, K-1} \left\{ \|x^{k+1} - x^k\|^2 + \|z^{k+1} - z^k\|^2 + \|x^k - x^{k-1}\|^2 + \|z^k - z^{k-1}\|^2 \right\} \quad (\text{EC.16}) \\ &\leq \sum_{k=0}^{K-1} \left( \kappa_1 \|x^{k+1} - x^k\|^2 + \kappa_2 \|z^{k+1} - z^k\|^2 + \kappa_3 \|x^k - x^{k-1}\|^2 + \kappa_4 \|z^k - z^{k-1}\|^2 \right) \\ &\leq \sum_{k=0}^{K-1} (\Psi_k - \Psi_{k+1}) = \Psi_0 - \Psi_K \leq \Psi_0 - v(\mu, \rho),\end{aligned}$$

where the last inequality is due to  $\Psi_K \geq v(\mu, \rho)$  for all  $K \geq 1$ . Now let  $\bar{k}$  be the minimizer in (EC.16); it follows that

$$\begin{aligned}&\max \left\{ \|x^{\bar{k}+1} - x^{\bar{k}}\|^2, \|z^{\bar{k}+1} - z^{\bar{k}}\|^2, \|x^{\bar{k}} - x^{\bar{k}-1}\|^2, \|z^{\bar{k}} - z^{\bar{k}-1}\|^2 \right\} \\ &\leq \left( \|x^{\bar{k}+1} - x^{\bar{k}}\|^2 + \|z^{\bar{k}+1} - z^{\bar{k}}\|^2 + \|x^{\bar{k}} - x^{\bar{k}-1}\|^2 + \|z^{\bar{k}} - z^{\bar{k}-1}\|^2 \right) \leq \frac{\Psi_0 - v(\mu, \rho)}{\kappa_{\min} K}.\end{aligned}$$

This completes the proof.  $\square$

#### EC.4.5. Proof of Lemma 7

*Proof.* By (34) and the  $\mu$ -strong convexity of the function in the following line, it holds for all  $x \in \mathcal{H}$  that

$$\begin{aligned}&\langle \nabla f(x^k) - \xi_g^k, x - x^k \rangle + h(x) + \langle \lambda^k, Ax - b \rangle + \frac{\rho}{2} \|Ax - b\|^2 + \frac{1}{2\mu} \|x - z^k\|^2 \\ &\geq \langle \nabla f(x^k) - \xi_g^k, x^{k+1} - x^k \rangle + h(x^{k+1}) + \langle \lambda^k, Ax^{k+1} - b \rangle + \frac{\rho}{2} \|Ax^{k+1} - b\|^2 \\ &\quad + \frac{1}{2\mu} \|x^{k+1} - z^k\|^2 + \langle \zeta^{k+1}, x - x^{k+1} \rangle + \frac{1}{2\mu} \|x^{k+1} - x\|^2.\end{aligned} \quad (\text{EC.17})$$

Using the Lipschitz condition of  $\nabla f$ , the convexity of  $g$ , inequality (EC.17) with  $x = x^k$ , the fact that  $\langle \zeta^{k+1}, x^{k+1} - x^k \rangle \leq \frac{1}{4\mu} \|x^{k+1} - x^k\|^2 + \mu \|\zeta^{k+1}\|^2$ , and the choice that  $\|\zeta^{k+1}\| \leq \epsilon_{k+1}$ , the descent in  $x$  can be derived as follows:

$$P(x^{k+1}, z^k, \lambda^k) \leq P(x^k, z^k, \lambda^k) + \mu \epsilon_{k+1}^2 - \frac{\mu^{-1} - 2L_f}{4} \|x^{k+1} - x^k\|^2.$$

The descent with respect to variable  $z$  can be derived as follows:

$$P(x^{k+1}, z^k, \lambda^k) - P(x^{k+1}, z^{k+1}, \lambda^k) = \frac{1}{2\mu} \left( \frac{2}{\beta} - 1 \right) \|z^{k+1} - z^k\|^2 \geq \frac{1}{2\beta\mu} \|z^{k+1} - z^k\|^2,$$

where we replace  $x^{k+1}$  by  $z^k + \frac{1}{\beta}(z^{k+1} - z^k)$  to get the equality, and the inequality is due to  $\beta \leq 1$ .

Finally, similar to Lemma 4, the change in  $\lambda$  is

$$P(x^{k+1}, z^{k+1}, \lambda^k) - P(x^{k+1}, z^{k+1}, \lambda^{k+1}) = -\frac{1}{\rho} \|\lambda^{k+1} - \lambda^k\|^2.$$

Combining the above three expressions completes the proof.  $\square$

#### EC.4.6. Proof of Lemma 8

*Proof.* The optimality condition (EC.17) with  $k = 0$  and  $x = \bar{x}$  (by Assumption 4,  $A\bar{x} = b$ ) gives

$$\begin{aligned} & \langle \nabla f(x^0) - \xi_g^0, x^1 - x^0 \rangle + h(x^1) + \langle \lambda^0, Ax^1 - b \rangle + \frac{\rho}{2} \|Ax^1 - b\|^2 + \frac{1}{2\mu} \|x^1 - z^0\|^2 \\ & \leq \langle \nabla f(x^0) - \xi_g^0, \bar{x} - x^0 \rangle + h(\bar{x}) + \frac{1}{2\mu} \|\bar{x} - z^0\|^2 + \langle \zeta^1, x^1 - \bar{x} \rangle. \end{aligned} \quad (\text{EC.18})$$

Since  $\|\zeta^1\| \leq \epsilon_1 \leq 1$ ,  $\mu < L_f^{-1}$ , and  $x^1, \bar{x} \in \mathcal{H}$ , we have

$$\langle \zeta^1, x^1 - \bar{x} \rangle \leq \frac{\mu}{2} \|\zeta^1\|^2 + \frac{1}{2\mu} \|x^1 - \bar{x}\|^2 \leq \frac{L_f^{-1}}{2} + \frac{1}{2\mu} D_{\mathcal{H}}^2. \quad (\text{EC.19})$$

The above two inequalities together with the  $L_h$ -Lipschitz continuity of  $h$  and  $\bar{x}, z^0 \in \mathcal{H}$  give that

$$\rho \|Ax^1 - b\|^2 \leq 2(M_{\nabla f} + M_{\partial g} + L_h)D_{\mathcal{H}} + 2\mu^{-1}D_{\mathcal{H}}^2 + L_f^{-1} + 2\|\lambda^0\| \max_{x \in \mathcal{H}} \|Ax - b\|. \quad (\text{EC.20})$$

Notice that due to  $\nabla f$  being Lipschitz and  $g$  being convex,  $P(x^1, z^0, \lambda^0)$  is bounded from above by

$$\begin{aligned} & f(x^0) - g(x^0) + \frac{L_f}{2} \|x^1 - x^0\|^2 + \langle \nabla f(x^0) - \xi_g^0, x^1 - x^0 \rangle + h(x^1) + \langle \lambda^0, Ax^1 - b \rangle + \frac{\rho}{2} \|Ax^1 - b\|^2 + \frac{1}{2\mu} \|x^1 - z^0\|^2 \\ & \leq f(x^0) - g(x^0) + \frac{L_f}{2} \|x^1 - x^0\|^2 + \langle \nabla f(x^0) - \xi_g^0, \bar{x} - x^0 \rangle + h(\bar{x}) + \frac{1}{2\mu} \|\bar{x} - z^0\|^2 + \langle \zeta^1, x^1 - \bar{x} \rangle \\ & \leq \max_{x \in \mathcal{H}} \{f(x) + h(x) - g(x)\} + (L_h + M_{\nabla f} + M_{\partial g})D_{\mathcal{H}} + \frac{L_f + 2\mu^{-1}}{2} D_{\mathcal{H}}^2 + \frac{L_f^{-1}}{2}, \end{aligned} \quad (\text{EC.21})$$

where the first inequality is due to (EC.18), and the second inequality is due to the compactness of  $\mathcal{H}$ , the  $L_h$ -Lipschitz continuity of  $h$ , and (EC.19). By Lemma 7, (EC.20), and (EC.21), we have

$$P(x^1, z^1, \lambda^1) = P(x^1, z^1, \lambda^0) + \rho \|Ax^1 - b\|^2 \leq P(x^1, z^0, \lambda^0) + \rho \|Ax^1 - b\|^2 \leq \bar{P}.$$

This completes the proof.  $\square$

**EC.4.7. Proof of Lemma 9**

*Proof.* By step 4 in Algorithm 3, there exists  $\xi_h^{k+1} \in \partial h(x^{k+1})$  such that

$$\zeta^{k+1} = \nabla f(x^k) - \xi_g^k + \xi_h^{k+1} + A^\top \lambda^{k+1} + \frac{1}{\mu}(x^{k+1} - z^k). \quad (\text{EC.22})$$

Since  $\lambda^0, b \in \text{Im}(A)$  and  $\lambda^{k+1} = \lambda^k + \rho(Ax^{k+1} - b)$ ,  $\lambda^{k+1} \in \text{Im}(A)$  for all  $k \in \mathbb{N}$ . Since  $z^0 \in \mathcal{H}$ ,  $x^k \in \mathcal{H}$ , and  $z^{k+1} = (1 - \beta)z^k + \beta x^{k+1}$ ,  $z^k \in \mathcal{H}$  for all  $k \in \mathbb{N}$  as well. Consequently,

$$\|\lambda^{k+1}\| \leq \frac{1}{\sigma_{\min}^+(A)} \left( M_{\nabla f} + M_{\partial g} + \frac{D_{\mathcal{H}}}{\mu} + 1 \right) + \frac{\|\xi_h^{k+1}\|}{\sigma_{\min}^+(A)}. \quad (\text{EC.23})$$

By (Melo et al. 2020, Lemma 4.7), we can bound  $\|\xi_h^{k+1}\|$  as follows:

$$\bar{d}\|\xi_h^{k+1}\| \leq (\bar{d} + \|x^{k+1} - \bar{x}\|)L_h + \langle \xi_h^{k+1}, x^{k+1} - \bar{x} \rangle \leq 2D_{\mathcal{H}}L_h + \langle \xi_h^{k+1}, x^{k+1} - \bar{x} \rangle. \quad (\text{EC.24})$$

Using (EC.22), we can further bound the inner product term in (EC.24) by

$$\begin{aligned} \langle \xi_h^{k+1}, x^{k+1} - \bar{x} \rangle &= \left\langle \zeta^{k+1} - \nabla f(x^k) + \xi_g^k - A^\top \lambda^{k+1} - \frac{1}{\mu}(x^{k+1} - z^k), x^{k+1} - \bar{x} \right\rangle \\ &\leq \left( M_{\nabla f} + M_{\partial g} + \frac{D_{\mathcal{H}}}{\mu} + 1 \right) D_{\mathcal{H}} - \langle \lambda^{k+1}, Ax^{k+1} - b \rangle \\ &\leq \left( M_{\nabla f} + M_{\partial g} + \frac{D_{\mathcal{H}}}{\mu} + 1 \right) D_{\mathcal{H}} + \frac{1}{\rho} \|\lambda^{k+1}\| \|\lambda^k\| - \frac{1}{\rho} \|\lambda^{k+1}\|^2, \end{aligned} \quad (\text{EC.25})$$

where we use the facts that  $A\bar{x} = b$  and  $\|\zeta^{k+1}\| \leq \epsilon_{k+1} \leq 1$  in the first inequality, and  $Ax^{k+1} - b = \frac{1}{\rho}(\lambda^{k+1} - \lambda^k)$  to get the second inequality. Combining (EC.23), (EC.24) and (EC.25), we have

$$\frac{\|\lambda^{k+1}\|^2}{\rho\sigma_{\min}^+(A)} + \bar{d}\|\lambda^{k+1}\| \leq \frac{\|\lambda^{k+1}\| \|\lambda^k\|}{\rho\sigma_{\min}^+(A)} + \frac{2D_{\mathcal{H}}}{\sigma_{\min}^+(A)} \left( M_{\nabla f} + M_{\partial g} + \frac{D_{\mathcal{H}}}{\mu} + L_h + 1 \right),$$

which further implies that, for all  $k \in \mathbb{N}$ ,

$$\left( \frac{\|\lambda^{k+1}\|}{\rho\sigma_{\min}^+(A)} + \bar{d} \right) \|\lambda^{k+1}\| \leq \frac{\|\lambda^{k+1}\|}{\rho\sigma_{\min}^+(A)} \|\lambda^k\| + \bar{d}\Lambda,$$

The claim then follows from an inductive argument: if  $\|\lambda^k\| \leq \Lambda$ , then the above inequality implies that  $\|\lambda^{k+1}\| \leq \Lambda$  as well, and  $\|\lambda^0\| \leq \Lambda$  holds by the definition of  $\Lambda$ .  $\square$

**EC.4.8. Proof of Lemma 10**

*Proof.* 1. For all  $k \in \mathbb{N}$ ,

$$\begin{aligned} P(x^k, z^k, \lambda^k) &= f(x^k) + h(x^k) - g(x^k) + \langle \lambda, Ax^k - b \rangle + \frac{\rho}{2} \|Ax^k - b\|^2 + \frac{1}{2\mu} \|x^k - z^k\|^2 \\ &\geq \min_{x \in \mathbb{R}^n} \{f(x) + h(x) - g(x)\} - \Lambda \max_{x \in \mathcal{H}} \|Ax - b\| > -\infty, \end{aligned}$$

where the inequality is due to the continuity of  $f$ ,  $h$ ,  $g$ , and  $\|\cdot\|$  over compact domain  $\mathcal{H}$ .

2. Lemma [7](#) implies that, for all  $k \in \mathbb{N}$ ,

$$\eta (\|x^{k+1} - x^k\|^2 + \|z^{k+1} - z^k\|^2) \leq P(x^k, z^k, \lambda^k) - P(x^{k+1}, z^{k+1}, \lambda^{k+1}) + \frac{1}{\rho} \|\lambda^{k+1} - \lambda^k\|^2 + \mu \epsilon_{k+1}^2.$$

Summing the above inequality over  $k = 1, \dots, K$ ,

$$\begin{aligned} \eta K \min_{k \in [K]} \{ \|x^{k+1} - x^k\|^2 + \|z^{k+1} - z^k\|^2 \} &\leq \eta \sum_{k=1}^K \{ \|x^{k+1} - x^k\|^2 + \|z^{k+1} - z^k\|^2 \} \\ &\leq P(x^1, z^1, \lambda^1) - P(x^{K+1}, z^{K+1}, \lambda^{K+1}) + \frac{1}{\rho} \sum_{k=1}^K \|\lambda^{k+1} - \lambda^k\|^2 + \mu \sum_{k=1}^K \epsilon_{k+1}^2 \\ &\leq \bar{P} - \underline{P} + \mu E + \frac{4}{\rho} \sum_{k=1}^{K+1} \|\lambda^k\|^2 \leq \bar{P} - \underline{P} + \mu E + \frac{4(K+1)\Lambda^2}{\rho}, \end{aligned}$$

where we use the fact that  $P(x^{K+1}, z^{K+1}, \lambda^{K+1}) \geq \underline{P}$  for all integer  $K \in \mathbb{Z}_+$  and  $\|\lambda^{k+1} - \lambda^k\|^2 \leq 2\|\lambda^{k+1}\|^2 + 2\|\lambda^k\|^2$  in the third inequality, and Lemma [9](#) in the last inequality. Let  $\bar{k}$  be the minimizer in the first line of the above chain of inequalities, then dividing both sides by any positive integer  $K$  gives

$$\max \left\{ \|x^{\bar{k}+1} - x^{\bar{k}}\|^2, \|z^{\bar{k}+1} - z^{\bar{k}}\|^2 \right\} \leq \frac{\bar{P} - \underline{P} + \mu E}{\eta K} + \frac{8\Lambda^2}{\eta \rho}.$$

This completes the proof.  $\square$
